# Supplementary material for: Immunomodulatory Effects of Diterpene Quinone Derivatives from the Roots of Horminum pyrenaicum in Human PBMC
Source: Hindawi journal article supplement (doi:10.1155/2018/2980295), 2018-01-01

**A**

Neopterin formation [% of control]

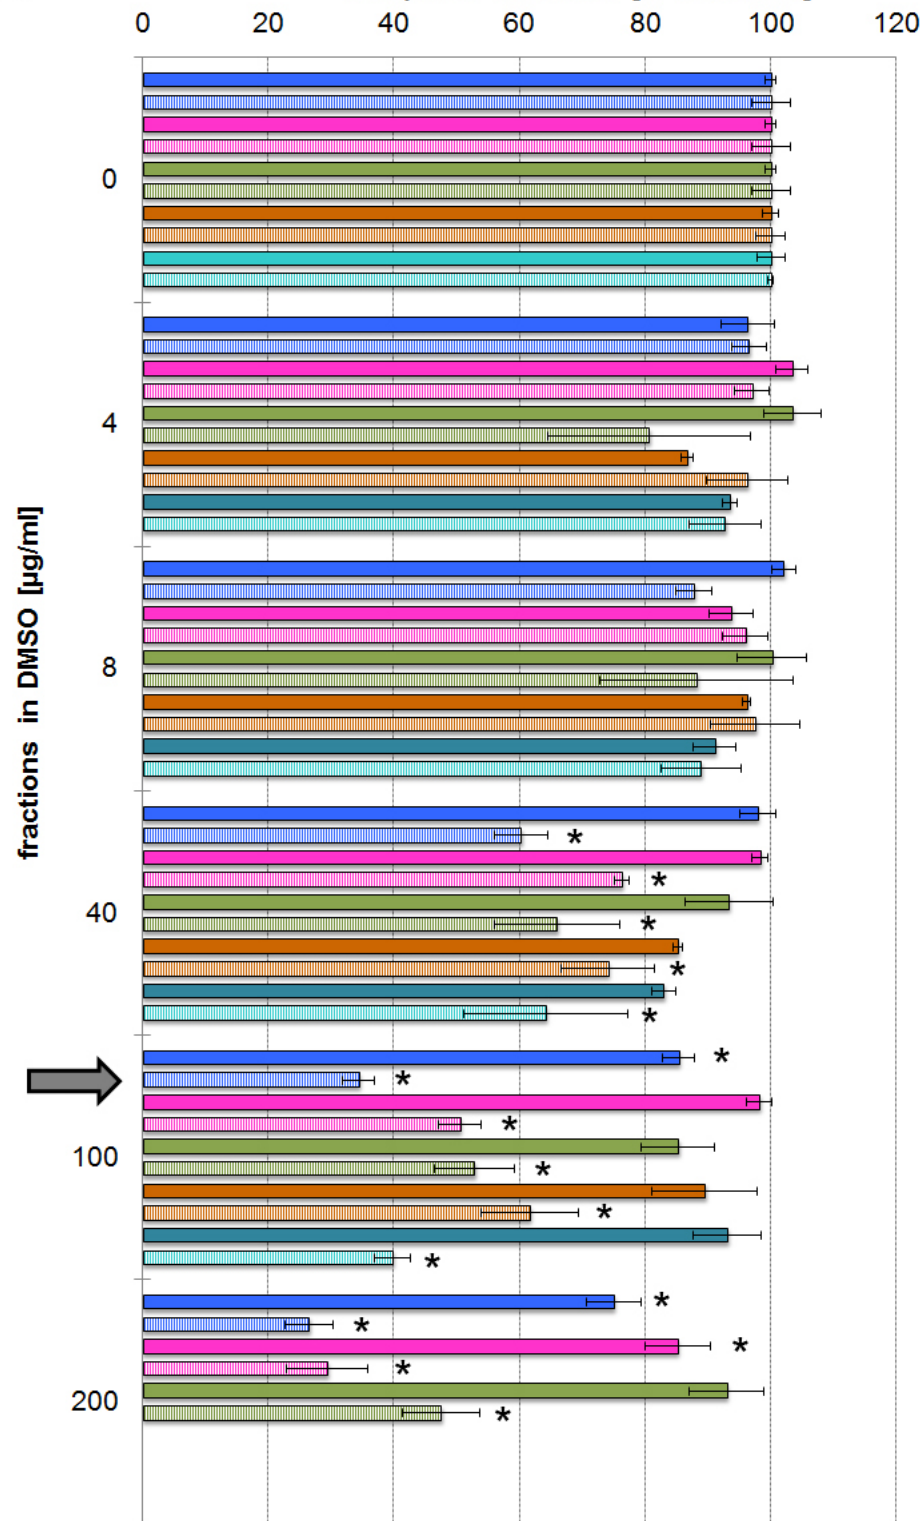**B**

Kyn/Trp [% of control]

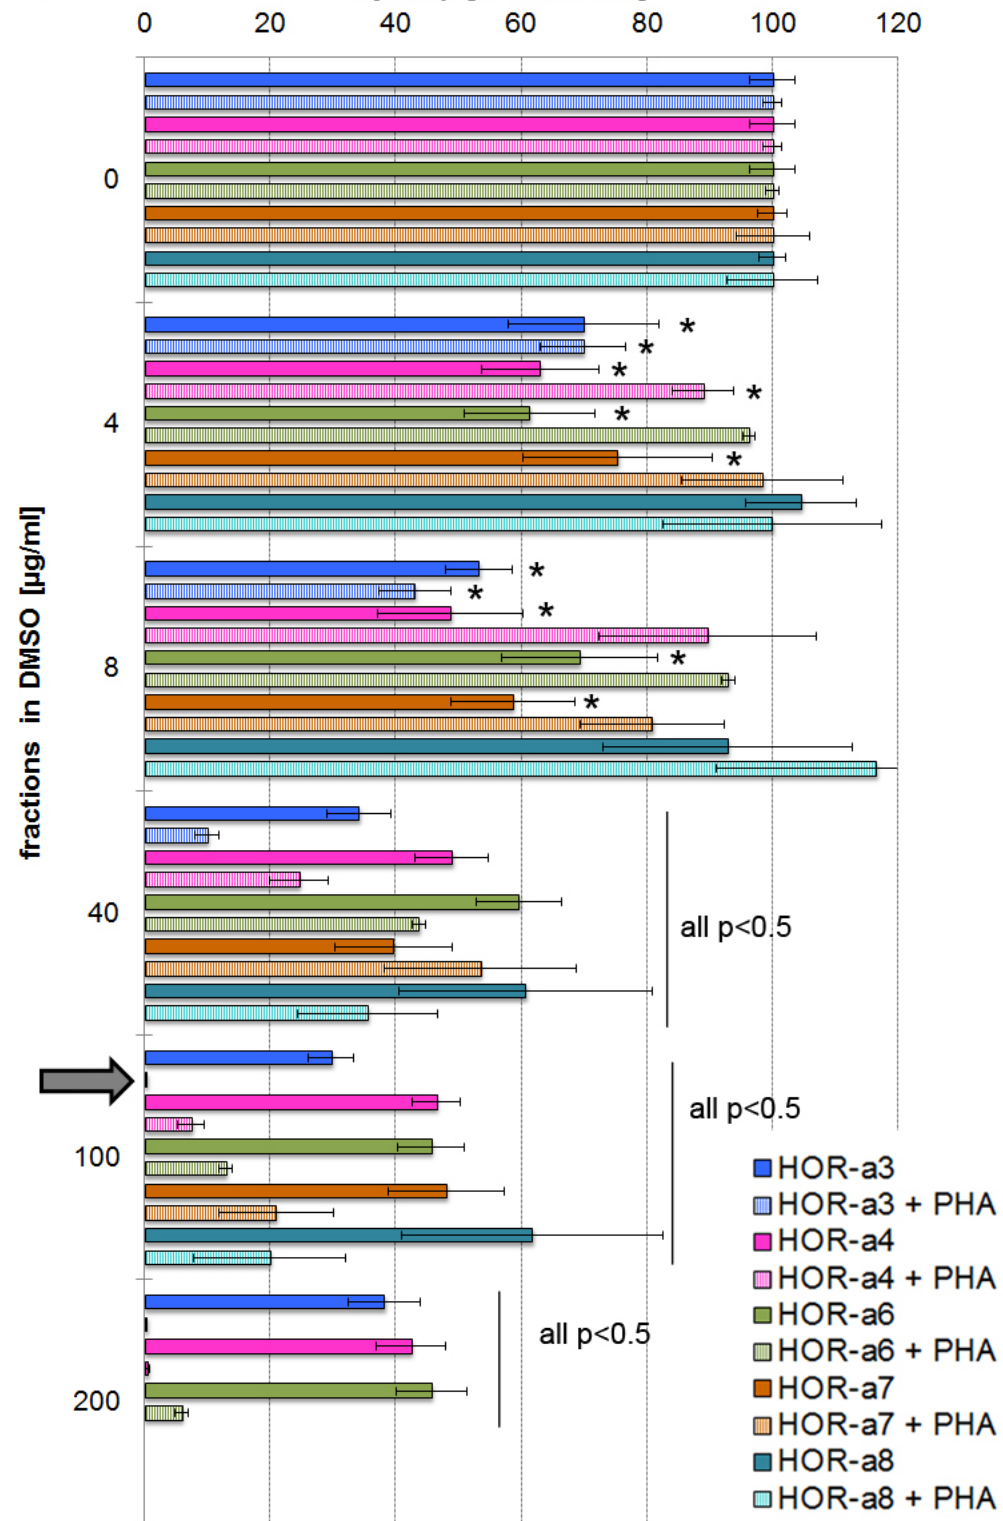

Supplement: f1 [file 2980295.f1.pdf]
